# Supplementary material
Source: PubMed Central journal article supplement (PMC2882140)

anti-SNT-1

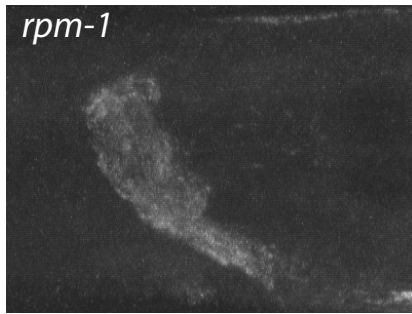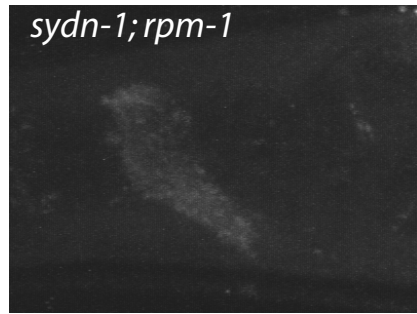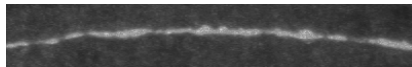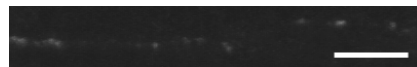

anti-ELKS-1

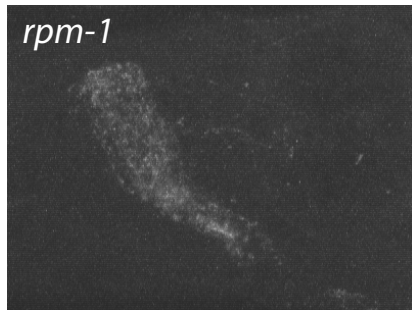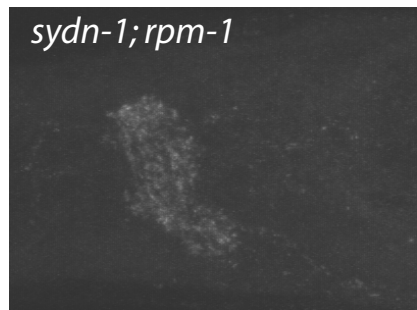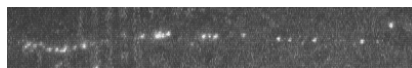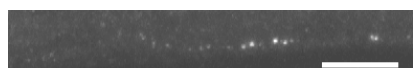

Supplement: supp_137.13.2237_049692FigS2.pdf [file supp_137.13.2237_049692FigS2.pdf]

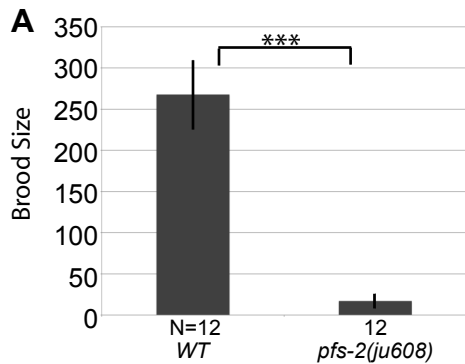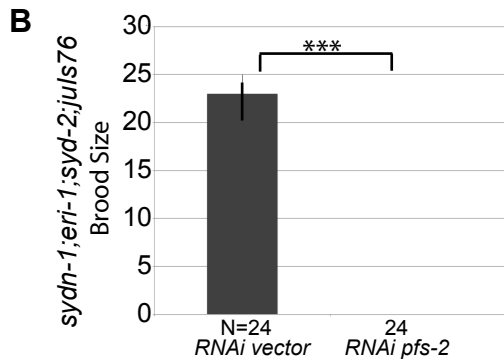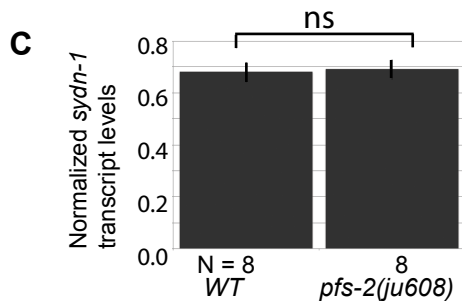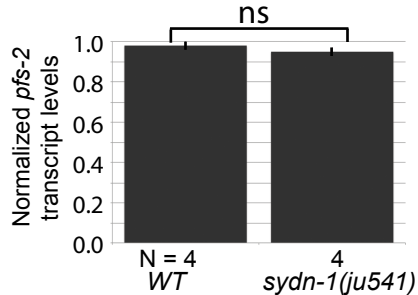

Supplement: supp_137.13.2237_049692FigS3.pdf [file supp_137.13.2237_049692FigS3.pdf]
